# Supplementary material
Source: PubMed Central journal article supplement (PMC7395545)
Supplement: pnas.1920554117.sapp.pdf [file pnas.1920554117.sapp.pdf]

1 **SUPPORTING INFORMATION - Individual Learning Phenotypes Drive Collective Behavior**

2 Chelsea N. Cook<sup>1\*</sup>, Natalie J. Lemanski<sup>2</sup>, Thiago Mosqueiro<sup>2</sup>, Jürgen Gadau<sup>3</sup>, Cahit Ozturk<sup>1</sup>,  
3 Noa Pinter-Wollman<sup>2†</sup>, Brian H. Smith<sup>1†</sup>

4

5 **Affiliations**

6 <sup>1</sup> School of Life Sciences, Arizona State University, Tempe, USA

7 <sup>2</sup> Department of Ecology and Evolutionary Biology, University of California Los Angeles, Los  
8 Angeles, USA

9 <sup>3</sup> Institute for Evolution and Biodiversity, University of Münster, Münster, Germany

10 †Co-Senior Authors

11 \*Corresponding Author, [cncook1@asu.edu](mailto:cncook1@asu.edu)

12

13

14

15

16

17

18

19

20

21

22

23

24

25

|         | Colony Type |      |      |         |
|---------|-------------|------|------|---------|
|         | High        | Low  | Mix  | Control |
| High LI | 650         | 0    | 325  | 0       |
| Low LI  | 0           | 650  | 325  | 0       |
| Control | 650         | 650  | 650  | 1300    |
| Totals  | 1300        | 1300 | 1300 | 1300    |

26 Table S1: The number of honey bees in each experimental colony by genetic line. Each of  
27 the 4 created colonies were set up in this way each week. We counted and marked the thorax  
28 each bee from the learning lines, and counted but did not mark supplemental control bees.  
29

| Day   | Feeder Treatment | Odor Added to Feeder | Color of Feeder |
|-------|------------------|----------------------|-----------------|
| Day 1 | Familiar         | Hexanol              | Red             |
| Day 2 | Familiar + X     | Hexanol + Octanone   | Red + Blue      |
| Day 3 | Familiar + Y     | Hexanol + Geraniol   | Red + Pink      |
| Day 4 | Familiar + Z     | Hexanol + Citranol   | Red + Orange    |

30  
31  
32  
33  
34  
35  
36  
37

**Table S2: The weekly routine of feeder characteristics and placement.** Each feeder had 1M sucrose solution. Color, odor, and location respectively varied by feeder. The treatment sequence was the same each week.

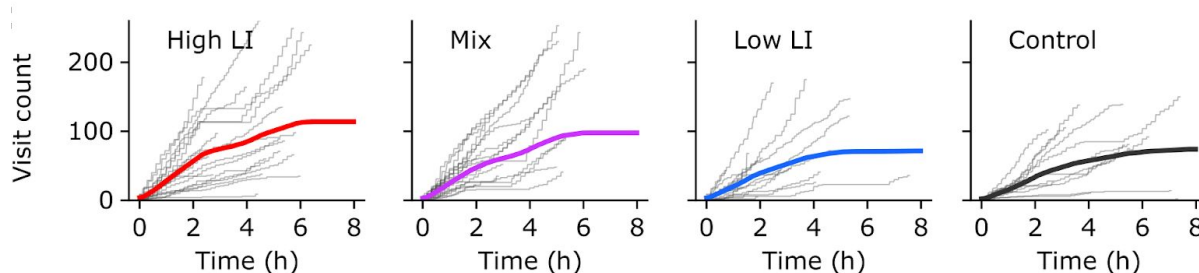

38  
39  
40  
41  
42  
43  
44  
45

**Figure S1: The cumulative visitation to all feeders over time, averaged across days.** The thick colored line is the average, and the gray stepwise lines are visitation on a single day by a single colony. Colored lines are the same data shown in Figure 2B.

| contrast       | estimate | SE    | df  | z.ratio | p.value |
|----------------|----------|-------|-----|---------|---------|
| control - high | 0.082    | 0.084 | Inf | 0.969   | 0.767   |
| control - low  | -0.065   | 0.099 | Inf | -0.659  | 0.912   |
| control - mix  | 0.293    | 0.088 | Inf | 3.336   | 0.005   |

|            |        |       |     |        |       |
|------------|--------|-------|-----|--------|-------|
| high - low | -0.147 | 0.082 | Inf | -1.798 | 0.274 |
| high - mix | 0.212  | 0.068 | Inf | 3.103  | 0.010 |
| low - mix  | 0.358  | 0.085 | Inf | 4.198  | 0.000 |

46

47 Table S3: A table of the pairwise post hoc tests of how LI line predicts percent revisitation to all

48 feeders, referenced in figure 2C.

49

50

| <b>contrast</b>                  | <b>estimate</b> | <b>SE</b> | <b>df</b> | <b>z.ratio</b> | <b>p.value</b> |
|----------------------------------|-----------------|-----------|-----------|----------------|----------------|
| constant,control - novel,control | 0.163           | 0.080     | Inf       | 2.031          | 0.461          |
| constant,control - constant,high | -1.363          | 0.061     | Inf       | -22.431        | 0.000          |
| constant,control - novel,high    | -0.249          | 0.072     | Inf       | -3.437         | 0.014          |
| constant,control - constant,low  | -0.214          | 0.073     | Inf       | -2.931         | 0.067          |
| constant,control - novel,low     | -0.298          | 0.072     | Inf       | -4.162         | 0.001          |
| constant,control - constant,mix  | -1.467          | 0.060     | Inf       | -24.393        | 0.000          |
| constant,control - novel,mix     | 0.219           | 0.081     | Inf       | 2.701          | 0.122          |
| novel,control - constant,high    | -1.526          | 0.065     | Inf       | -23.508        | 0.000          |
| novel,control - novel,high       | -0.411          | 0.076     | Inf       | -5.421         | 0.000          |
| novel,control - constant,low     | -0.376          | 0.076     | Inf       | -4.925         | 0.000          |
| novel,control - novel,low        | -0.460          | 0.075     | Inf       | -6.129         | 0.000          |
| novel,control - constant,mix     | -1.630          | 0.064     | Inf       | -25.338        | 0.000          |

|                              |        |       |     |         |       |
|------------------------------|--------|-------|-----|---------|-------|
| novel,control - novel,mix    | 0.057  | 0.084 | Inf | 0.675   | 0.998 |
| constant,high - novel,high   | 1.115  | 0.055 | Inf | 20.194  | 0.000 |
| constant,high - constant,low | 1.150  | 0.056 | Inf | 20.555  | 0.000 |
| constant,high - novel,low    | 1.065  | 0.054 | Inf | 19.661  | 0.000 |
| constant,high - constant,mix | -0.104 | 0.038 | Inf | -2.756  | 0.106 |
| constant,high - novel,mix    | 1.583  | 0.066 | Inf | 23.818  | 0.000 |
| novel,high - constant,low    | 0.035  | 0.068 | Inf | 0.512   | 1.000 |
| novel,high - novel,low       | -0.049 | 0.067 | Inf | -0.736  | 0.996 |
| novel,high - constant,mix    | -1.219 | 0.055 | Inf | -22.358 | 0.000 |
| novel,high - novel,mix       | 0.468  | 0.077 | Inf | 6.066   | 0.000 |
| constant,low - novel,low     | -0.084 | 0.068 | Inf | -1.248  | 0.918 |
| constant,low - constant,mix  | -1.254 | 0.055 | Inf | -22.690 | 0.000 |
| constant,low - novel,mix     | 0.433  | 0.078 | Inf | 5.574   | 0.000 |
| novel,low - constant,mix     | -1.170 | 0.053 | Inf | -21.864 | 0.000 |
| novel,low - novel,mix        | 0.517  | 0.076 | Inf | 6.767   | 0.000 |
| constant,mix - novel,mix     | 1.687  | 0.066 | Inf | 25.604  | 0.000 |

51 Table S4: A table of the pairwise post hoc tests of how the Line\*Feeder interaction predicts

52 number of visits, which corresponds to letters in figure 2D.

53

54

| contrast | estimate | SE | df | z.ratio | p.value |
|----------|----------|----|----|---------|---------|
|----------|----------|----|----|---------|---------|

|                                  |        |       |     |         |       |
|----------------------------------|--------|-------|-----|---------|-------|
| control,constant - high,constant | 0.251  | 0.127 | Inf | 1.975   | 0.499 |
| control,constant - low,constant  | -0.150 | 0.151 | Inf | -0.996  | 0.975 |
| control,constant - mix,constant  | 0.523  | 0.132 | Inf | 3.958   | 0.002 |
| control,constant - control,novel | -0.972 | 0.147 | Inf | -6.635  | 0.000 |
| control,constant - high,novel    | -1.256 | 0.127 | Inf | -9.913  | 0.000 |
| control,constant - low,novel     | -0.881 | 0.141 | Inf | -6.231  | 0.000 |
| control,constant - mix,novel     | -1.394 | 0.135 | Inf | -10.311 | 0.000 |
| high,constant - low,constant     | -0.402 | 0.125 | Inf | -3.208  | 0.029 |
| high,constant - mix,constant     | 0.272  | 0.102 | Inf | 2.669   | 0.132 |
| high,constant - control,novel    | -1.223 | 0.120 | Inf | -10.209 | 0.000 |
| high,constant - high,novel       | -1.507 | 0.095 | Inf | -15.937 | 0.000 |
| high,constant - low,novel        | -1.133 | 0.114 | Inf | -9.972  | 0.000 |
| high,constant - mix,novel        | -1.645 | 0.106 | Inf | -15.566 | 0.000 |
| low,constant - mix,constant      | 0.673  | 0.130 | Inf | 5.174   | 0.000 |
| low,constant - control,novel     | -0.822 | 0.145 | Inf | -5.679  | 0.000 |
| low,constant - high,novel        | -1.105 | 0.125 | Inf | -8.873  | 0.000 |
| low,constant - low,novel         | -0.731 | 0.140 | Inf | -5.238  | 0.000 |
| low,constant - mix,novel         | -1.244 | 0.133 | Inf | -9.335  | 0.000 |
| mix,constant - control,novel     | -1.495 | 0.125 | Inf | -11.964 | 0.000 |
| mix,constant - high,novel        | -1.778 | 0.101 | Inf | -17.615 | 0.000 |

|                            |        |       |     |         |       |
|----------------------------|--------|-------|-----|---------|-------|
| mix,constant - low,novel   | -1.404 | 0.119 | Inf | -11.803 | 0.000 |
| mix,constant - mix,novel   | -1.917 | 0.111 | Inf | -17.197 | 0.000 |
| control,novel - high,novel | -0.284 | 0.119 | Inf | -2.380  | 0.251 |
| control,novel - low,novel  | 0.091  | 0.135 | Inf | 0.673   | 0.998 |
| control,novel - mix,novel  | -0.422 | 0.128 | Inf | -3.291  | 0.022 |
| high,novel - low,novel     | 0.374  | 0.113 | Inf | 3.316   | 0.021 |
| high,novel - mix,novel     | -0.138 | 0.105 | Inf | -1.317  | 0.893 |
| low,novel - mix,novel      | -0.513 | 0.122 | Inf | -4.189  | 0.001 |

55 Table S5: A table of the pairwise post hoc tests of how the Line\*Feeder interaction predicts  
56 percent revisitation, which corresponds to letters in figure 2E.

57

58

59

|                            | LR Chisq | Df    | Pr(>Chisq) |
|----------------------------|----------|-------|------------|
| <b>BeeType</b>             | 100.073  | 2.000 | 0.000      |
| <b>Feeder</b>              | 2196.156 | 1.000 | 0.000      |
| <b>Year</b>                | 479.995  | 1.000 | 0.000      |
| <b>BeeType:Feeder</b>      | 47.718   | 2.000 | 0.000      |
| <b>BeeType:Year</b>        | 498.209  | 2.000 | 0.000      |
| <b>Feeder:Year</b>         | 61.341   | 1.000 | 0.000      |
| <b>BeeType:Feeder:Year</b> | 31.492   | 2.000 | 0.000      |

60

61 Table S6: **Individual visitation by bee type differed across two experimental years.** GLM

62 results showing the three-way interaction between year and the type of bee visiting a feeder

63 (Figure 3). There is likely a difference in year because of several reasons, including 1) Colonies

64 were selected from different queens from different breeders in 2017 and 2018 and climactic  
 65 conditions were different in 2017 compared to 2018 even though experiments were done in the  
 66 same time frame (June-July in 2017, June in 2018).

67

68

| <b>contrast</b>                  | <b>estimate</b> | <b>SE</b> | <b>df</b> | <b>z.ratio</b> | <b>p.value</b> |
|----------------------------------|-----------------|-----------|-----------|----------------|----------------|
| control,familiar - high,familiar | -0.220          | 0.054     | Inf       | -4.102         | 0.001          |
| control,familiar - low,familiar  | 0.624           | 0.068     | Inf       | 9.210          | 0.000          |
| control,familiar - control,novel | 1.387           | 0.076     | Inf       | 18.320         | 0.000          |
| control,familiar - high,novel    | 1.425           | 0.077     | Inf       | 18.564         | 0.000          |
| control,familiar - low,novel     | 1.986           | 0.095     | Inf       | 20.794         | 0.000          |
| high,familiar - low,familiar     | 0.844           | 0.065     | Inf       | 12.916         | 0.000          |
| high,familiar - control,novel    | 1.607           | 0.074     | Inf       | 21.841         | 0.000          |
| high,familiar - high,novel       | 1.645           | 0.075     | Inf       | 22.033         | 0.000          |
| high,familiar - low,novel        | 2.206           | 0.094     | Inf       | 23.512         | 0.000          |
| low,familiar - control,novel     | 0.763           | 0.084     | Inf       | 9.049          | 0.000          |
| low,familiar - high,novel        | 0.801           | 0.085     | Inf       | 9.394          | 0.000          |
| low,familiar - low,novel         | 1.362           | 0.102     | Inf       | 13.290         | 0.000          |
| control,novel - high,novel       | 0.038           | 0.092     | Inf       | 0.413          | 0.998          |
| control,novel - low,novel        | 0.599           | 0.108     | Inf       | 5.546          | 0.000          |



|                        |       |       |     |       |       |
|------------------------|-------|-------|-----|-------|-------|
| high,novel - low,novel | 0.561 | 0.109 | Inf | 5.159 | 0.000 |
|------------------------|-------|-------|-----|-------|-------|

69 Table S7: A table of the pairwise GLM contrasts of how the Line\*Feeder interaction predicts  
70 number of visits by each line in the mixed colonies in 2017, which corresponds to letters in  
71 figure 3A.

72  
73  
74  
75

| <b>contrast</b>                  | <b>estimate</b> | <b>SE</b> | <b>df</b> | <b>z.ratio</b> | <b>p.value</b> |
|----------------------------------|-----------------|-----------|-----------|----------------|----------------|
| control,familiar - high,familiar | 0.389           | 0.043     | Inf       | 8.949          | 0.000          |
| control,familiar - low,familiar  | -0.227          | 0.037     | Inf       | -6.117         | 0.000          |
| control,familiar - control,novel | 0.567           | 0.041     | Inf       | 13.904         | 0.000          |
| control,familiar - high,novel    | 1.451           | 0.054     | Inf       | 26.775         | 0.000          |
| control,familiar - low,novel     | 0.827           | 0.044     | Inf       | 18.827         | 0.000          |
| high,familiar - low,familiar     | -0.616          | 0.042     | Inf       | -14.779        | 0.000          |
| high,familiar - control,novel    | 0.178           | 0.045     | Inf       | 3.947          | 0.001          |
| high,familiar - high,novel       | 1.062           | 0.057     | Inf       | 18.485         | 0.000          |
| high,familiar - low,novel        | 0.438           | 0.048     | Inf       | 9.140          | 0.000          |
| low,familiar - control,novel     | 0.793           | 0.039     | Inf       | 20.441         | 0.000          |
| low,familiar - high,novel        | 1.678           | 0.053     | Inf       | 31.807         | 0.000          |

|                            |        |       |     |         |       |
|----------------------------|--------|-------|-----|---------|-------|
| low,familiar - low,novel   | 1.053  | 0.042 | Inf | 25.015  | 0.000 |
| control,novel - high,novel | 0.884  | 0.055 | Inf | 15.959  | 0.000 |
| control,novel - low,novel  | 0.260  | 0.045 | Inf | 5.725   | 0.000 |
| high,novel - low,novel     | -0.625 | 0.058 | Inf | -10.810 | 0.000 |

76 Table S8: A table of the pairwise GLM contrasts of how the Line\*Feeder interaction predicts  
77 number of visits by each line in the mixed colonies in 2018, which corresponds to letters in  
78 figure 3B.

79  
80  
81

**2017**

| Colony Used for LI Field Experiment | LI of Colony | Queen Colony of Origin | Drone Colony of Origin |
|-------------------------------------|--------------|------------------------|------------------------|
| G-5                                 | High LI      | 206                    | 403                    |
| G-6                                 | High LI      | 133                    | 107                    |
| G-3                                 | High LI      | 0                      | 2GY                    |
| G-9                                 | High LI      | 133                    | 303                    |
| G-4                                 | High LI      | 303                    | 107                    |
| G-2                                 | High LI      | 206                    | 2GY                    |
| G-8                                 | High LI      | 26                     | 88                     |
| G-7                                 | High LI      | 112                    | 125                    |
|                                     |              |                        |                        |
| B-2                                 | Low LI       | 3                      | 67                     |
| B-12                                | Low LI       | 143                    | 129                    |
| B-3                                 | Low LI       | 143                    | 67                     |
| B-8                                 | Low LI       | 26                     | 129                    |
| B-10                                | Low LI       | 107                    | 303                    |
| B-14                                | Low LI       | 26                     | 403                    |
| B-4                                 | Low LI       | 0                      | 67                     |

82 Table S9: Queen and drone insemination pairings during spring 2017 testing.

83  
84

**2018**

| Colony Used for LI Field Experiment | LI of Colony | Queen Colony of Origin | Drone Colony of Origin |
|-------------------------------------|--------------|------------------------|------------------------|
| G-4                                 | High LI      | 100                    | 52                     |
| G-5                                 | High LI      | PLS5                   | 9                      |

|      |         |       |      |
|------|---------|-------|------|
| G-6  | High LI | 199-A | 308  |
| G-7  | High LI | 66    | 67   |
| G-8  | High LI | 100   | 305  |
| G-9  | High LI | 199-A | 67   |
| G-10 | High LI | PLS5  | 72   |
| G-3  | High LI | 100   | 27   |
|      |         |       |      |
| O-34 | Low LI  | 66    | PLS1 |
| O-35 | Low LI  | PLS1  | 222  |
| O-36 | Low LI  | PLS1  | 222  |
| O-37 | Low LI  | 100   | PLS1 |
| O-38 | Low LI  | 16    | 317  |
| O-39 | Low LI  | PLS5  | 65   |
| O-40 | Low LI  | 199-A | 72   |
| O-41 | Low LI  | 52    | 27   |

85 Table S10: Queen and drone insemination pairings during spring 2018 testing. No queens  
86 survived from 2017 to 2018, therefore all numbers are original.  
87

| Hive               | Good |     |  | Bad |     |  | Mix |    |     | Control |     |    |
|--------------------|------|-----|--|-----|-----|--|-----|----|-----|---------|-----|----|
|                    |      |     |  |     |     |  |     |    |     |         |     |    |
| G-5 (Red)          | 396  |     |  |     |     |  | 135 |    |     |         |     |    |
| G-6 (Pink)         | 136  |     |  |     |     |  | 50  |    |     |         |     |    |
| G-3 (orange)       | 150  |     |  |     |     |  | 68  | 32 |     |         |     |    |
| B-2 (Light Blue)   |      |     |  | 204 |     |  | 69  | 35 |     |         |     |    |
| B-12 (Light Green) |      |     |  | 167 |     |  | 55  | 47 |     |         |     |    |
| B-3 (White)        |      |     |  | 238 |     |  | 80  | 20 |     |         |     |    |
| 0                  | 150  | 50  |  | 150 | 50  |  |     |    | 200 | 145     | 255 |    |
| Balcony            |      | 200 |  |     | 200 |  |     |    | 200 |         | 178 | 22 |

|               |     |  |             |     |  |             |  |  |             |     |             |
|---------------|-----|--|-------------|-----|--|-------------|--|--|-------------|-----|-------------|
| 404           | 200 |  |             | 200 |  |             |  |  | 251         | 150 |             |
| 317           |     |  | 50          |     |  | 50          |  |  | 200         |     | 200         |
| <b>Totals</b> |     |  | <b>1332</b> |     |  | <b>1259</b> |  |  | <b>1191</b> |     | <b>1201</b> |

88  
89  
90  
91  
92  
93  
94

Table S11: Week 1 Colony preparation, May 23-25<sup>th</sup> 2017

| Hive               | Good |     |  | Bad |     |  | Mix |     |  | Control |  |     |
|--------------------|------|-----|--|-----|-----|--|-----|-----|--|---------|--|-----|
| G-5 (Red)          | 81   | 120 |  |     |     |  | 100 |     |  |         |  |     |
| G-6 (Pink)         | 200  |     |  |     |     |  | 100 |     |  |         |  |     |
| G-3 (orange)       | 200  |     |  |     |     |  | 100 |     |  |         |  |     |
| B-2 (Light Blue)   |      |     |  | 200 |     |  | 100 |     |  |         |  |     |
| B-12 (Light Green) |      |     |  | 200 |     |  | 100 |     |  |         |  |     |
| B-3 (White)        |      |     |  | 200 |     |  | 100 |     |  |         |  |     |
| 0                  |      | 200 |  |     | 200 |  |     | 200 |  |         |  | 400 |
| 33                 |      | 200 |  |     | 200 |  |     | 200 |  |         |  | 400 |
| 126                |      | 200 |  |     | 200 |  |     | 200 |  |         |  | 400 |

|               |  |  |             |  |  |             |  |  |             |  |  |             |
|---------------|--|--|-------------|--|--|-------------|--|--|-------------|--|--|-------------|
| <b>Totals</b> |  |  | <b>1200</b> |  |  | <b>1200</b> |  |  | <b>1200</b> |  |  | <b>1200</b> |
|---------------|--|--|-------------|--|--|-------------|--|--|-------------|--|--|-------------|

95  
96  
97  
98  
99  
100  
101

Table S12: Week 2 colony prep, June 7-8<sup>th</sup> 2017

**Week 3: All hives died because of heat - June 14-15**

| Hive              | Good |     |             | Bad |     |             | Mix |     |             | Control |     |             |
|-------------------|------|-----|-------------|-----|-----|-------------|-----|-----|-------------|---------|-----|-------------|
| G-9(Pink)         | 81   | 120 |             |     |     |             | 100 |     |             |         |     |             |
| G-4 (Red)         | 200  |     |             |     |     |             | 100 |     |             |         |     |             |
| G-5 (orange)      | 200  |     |             |     |     |             | 100 |     |             |         |     |             |
| B-8 (Light Blue)  |      |     |             | 200 |     |             | 100 |     |             |         |     |             |
| B-12(Light Green) |      |     |             | 200 |     |             | 100 |     |             |         |     |             |
| B-2(Yellow)       |      |     |             | 200 |     |             | 100 |     |             |         |     |             |
| 0                 |      | 200 |             |     | 200 |             |     | 200 |             |         | 400 |             |
| 33                |      | 200 |             |     | 200 |             |     | 200 |             |         | 400 |             |
| 126               |      | 200 |             |     | 200 |             |     | 200 |             |         | 400 |             |
| <b>Totals</b>     |      |     | <b>1200</b> |     |     | <b>1200</b> |     |     | <b>1200</b> |         |     | <b>1200</b> |

102  
103  
104  
105

Table S13: Week 4 colony prep, June 21-22 2017

| Hive              | Good |     |             | Bad |     |             | Mix |     |             | Control |     |             |
|-------------------|------|-----|-------------|-----|-----|-------------|-----|-----|-------------|---------|-----|-------------|
| G-5(Pink)         | 220  |     |             |     |     |             | 110 |     |             |         |     |             |
| G-3(Red)          | 220  |     |             |     |     |             | 110 |     |             |         |     |             |
| G-6 (orange)      | 220  |     |             |     |     |             | 110 |     |             |         |     |             |
| B-12 (Light Blue) |      |     |             | 220 |     |             | 110 |     |             |         |     |             |
| B-4(Light Green)  |      |     |             | 220 |     |             | 110 |     |             |         |     |             |
| B-3(Yellow)       |      |     |             | 124 | 96  |             | 110 |     |             |         |     |             |
| 104               |      | 220 |             |     | 220 |             |     | 220 |             |         | 373 |             |
| 0                 |      | 220 |             |     | 68  | 152         |     |     | 220         |         | 440 |             |
| 510               |      | 220 |             |     | 220 |             |     | 220 |             | 190     | 350 |             |
| <b>Totals</b>     |      |     | <b>1320</b> |     |     | <b>1320</b> |     |     | <b>1320</b> |         |     | <b>1253</b> |

106 Table S14: Week 5 colony prep, June 28-30 2017

107

| Hive         | Good |    |  | Bad |  |  | Mix |    |  | Control |  |  |
|--------------|------|----|--|-----|--|--|-----|----|--|---------|--|--|
| G-9(Pink)    | 220  |    |  |     |  |  | 110 |    |  |         |  |  |
| G-8 (Red)    | 220  |    |  |     |  |  | 110 |    |  |         |  |  |
| G-7 (orange) | 159  | 61 |  |     |  |  | 100 | 10 |  |         |  |  |

|                   |     |             |     |     |             |  |     |             |             |
|-------------------|-----|-------------|-----|-----|-------------|--|-----|-------------|-------------|
| B-14 (Light Blue) |     |             | 220 |     | 110         |  |     |             |             |
| B-2(Light Green)  |     |             | 220 |     | 110         |  |     |             |             |
| B-10(Yellow)      |     |             | 220 |     | 110         |  |     |             |             |
| 48                | 220 |             |     | 220 |             |  | 220 |             | 487         |
| 88                | 220 |             |     | 220 |             |  | 220 |             | 486         |
| 126               | 220 |             |     | 220 |             |  | 220 |             | 350         |
| <b>Totals</b>     |     | <b>1320</b> |     |     | <b>1320</b> |  |     | <b>1320</b> | <b>1373</b> |

Table S15: Colony Prep week 6, July 5-6, 2017

108  
109  
110  
111

| Hive             | Good |    | Bad |     | Mix |     | Control |  |  |
|------------------|------|----|-----|-----|-----|-----|---------|--|--|
| G-5(Pink)        | 220  | 70 |     |     |     | 110 |         |  |  |
| G-2 (Red)        | 220  | 80 |     |     |     | 110 |         |  |  |
| G-6 (orange)     | 70   |    |     |     |     | 100 | 10      |  |  |
| B-4 (Light Blue) |      |    | 220 |     |     | 110 |         |  |  |
| B-3(Light Green) |      |    | 110 | 110 |     | 110 |         |  |  |
| B-2(Yellow)      |      |    | 220 |     |     | 110 |         |  |  |

|               |  |     |             |  |     |             |  |     |             |  |     |             |
|---------------|--|-----|-------------|--|-----|-------------|--|-----|-------------|--|-----|-------------|
| 404           |  | 183 |             |  | 0   |             |  | 200 |             |  | 450 |             |
| 112           |  | 257 |             |  | 337 |             |  | 240 |             |  | 450 |             |
| 107           |  | 220 |             |  | 330 |             |  | 220 |             |  | 450 |             |
| <b>Totals</b> |  |     | <b>1320</b> |  |     | <b>1320</b> |  |     | <b>1320</b> |  |     | <b>1350</b> |

112 Table S16: Colony prep week 7, July 11-13, 2017

113

114

115 **2018**

116

| Hive              | Mix |     |  | Mix |     |  | Mix |     |  |
|-------------------|-----|-----|--|-----|-----|--|-----|-----|--|
| G-3(Pink)         | 110 |     |  | 110 |     |  | 110 |     |  |
| G-4 (Red)         | 110 |     |  | 110 |     |  | 110 |     |  |
| G-7 (orange)      | 110 |     |  | 110 |     |  | 110 |     |  |
| O-37 (Light Blue) | 110 |     |  | 110 |     |  | 110 |     |  |
| O-40(Light Green) | 110 |     |  | 110 |     |  | 110 |     |  |
| O-41(Yellow)      | 110 |     |  | 110 |     |  | 110 |     |  |
| P-1               |     | 220 |  |     | 220 |  |     | 220 |  |
| 100               |     | 220 |  |     | 220 |  |     | 220 |  |
| P-2               |     | 220 |  |     | 220 |  |     | 220 |  |



|               |  |  |             |  |  |             |  |  |             |
|---------------|--|--|-------------|--|--|-------------|--|--|-------------|
| <b>Totals</b> |  |  | <b>1320</b> |  |  | <b>1320</b> |  |  | <b>1320</b> |
|---------------|--|--|-------------|--|--|-------------|--|--|-------------|

117 Table S17: Colony prep week 7, May 22-23, 2018  
 118  
 119

| <b>Hive</b>       | <b>Mix</b> |     |             | <b>Mix</b> |     |             | <b>Mix</b> |     |             |
|-------------------|------------|-----|-------------|------------|-----|-------------|------------|-----|-------------|
| G-4(Pink)         | 110        |     |             | 110        |     |             | 110        |     |             |
| G-5 (Red)         | 110        |     |             | 110        |     |             | 110        |     |             |
| G-7 (orange)      | 110        |     |             | 110        |     |             | 110        |     |             |
| O-38 (Light Blue) | 110        |     |             | 110        |     |             | 110        |     |             |
| O-39(Light Green) | 110        |     |             | 110        |     |             | 110        |     |             |
| O-41(Yellow)      | 110        |     |             | 110        |     |             | 110        |     |             |
| P-1               |            | 220 |             |            | 220 |             |            | 220 |             |
| 88                |            | 220 |             |            | 220 |             |            | 220 |             |
| 112               |            | 220 |             |            | 220 |             |            | 220 |             |
| <b>Totals</b>     |            |     | <b>1320</b> |            |     | <b>1320</b> |            |     | <b>1320</b> |

120  
 121 Table S18: Colony prep week 7, May 29-30, 2018  
 122  
 123
